# Supplementary material
Source: Elsevier journal article supplement (https://www.sciencedirect.com/science/article/pii/S1646289012000301)
Supplement: mmc1 [file S1646289012000301:mmc1.doc]

| ***Autor*** | ***Tipo de Estudo*** | ***Descrição do estudo*** | ***Material de enxerto*** | ***Avaliador cego*** | ***Altura do osso residual*** | ***Altura ganha*** | ***Taxa de sobrevivência dos implantes*** | ***Conclusões*** | ***Observações*** |
| --- | --- | --- | --- | --- | --- | --- | --- | --- | --- |
| Raja S. 2009 | Artigo de revisão | - | - | - | - | - | - | Cada técnica de sinus lift tem as suas vantagens; Selecionar a técnica baseando-se nos resultados a longo prazo; | Apresenta as vantagens e desvantagens e taxas de sucesso para as varias técnicas. |
| Canullo L, Claudia D. 2009 | ECR | -NanoBone® em sinus lift de maxilas severamente reabsorvidos sem membrana.  -16 p.  -randomizados 2 grupos: Grupo 1- 3 meses Grupo 2- 6 meses;  -Colocação de implantes e recolha com uma broca trefina de uma amostra histologica e histomorfometerica para análise. | NanoBone® | - | 1-3mm | -Grupo 1 - 8 ± 3,34% de novo osso formado; 45± 5,10% espaço medular; 47 ± 6,81% de NanoBone® residual  -Grupo 2- 48 ± 4,63% de novo osso formado; 24± 7,23% espaço medular; 28 ± 5,33% de NanoBone® residual | - | Os resultados preliminares concluen que a utilização de NanoBone®, é um processo fiavel ápos um periodo de cicatrização, mesmo em situações de anatomia critica. |  |
| Tosoulis G, Yao S, Fine J. 2011 | Artigo de revisão | - | - | - | - | - | - | -Sinus lift não existe diferença clínica no tipo de enxerto utilizado.  -Fumar não é uma contraindicação absoluta. | - |
| Esposito M, Grusonvin M, Rees J, Karasoulos D, Felice P, et al 2010. | Revisão sistematica | - | - | - | - | - | - | -Conclusões baseadas num número reduzido de ensaios clínicos, com curtos follow-up (grande risco de vies);  - Sinus lift com altura entre 1 e 5 mm de altura ossea residual sem a adição de enxerto ósseos podem ser suficiente para a reabilitação implanto suportada;  - Substitutos osseos podem ser usados para substituir o osso autologo;  -PRP não melhora os resultados clínicos dos sinus lift. | Realizada para a Cochrane |
| Somanathan R. Šimůnek A. 2006 | Artigo de revisão | - | - | - | - | - | - | -O osso autologo apresenta certas limitações;  -β-TCP mostra efectividade nos sinus lifts  -β-TCP Vs. o DBB é reapsorvido mais rápido e tempo de cura menor  -Estudo a longo prazo do β-TCP em combinação ABG são necessários; | - |
| Li J, Wang H. 2008 | Artigo de revisão | - | - | - | - | - | - | -As complicações associadas aos enxertos são influenciadas por multiplos factores.  -Um plano de tratamento adequado, boa historia clínica, boa técnica cirurgica reduz as complicações.  A melhora da manufactura dos matérias de enxerto de modo a garantir a segurança e a reabelitar com grandes taxas de sucesso e poucas complicações. |  |
| Barone A. Crespi R, Aldini N N, Fine M, et al. 2005 | ECR | -Comparação histologica do ABG Vs.1:1 de ABG e xenoenxerto em sinus lift bilaterias.  -Amostra -18p.  -Ápos 5 meses procedeu-se a biópsia e colocação de implantes. | ABG Vs. mistura 1:1 de enxerto particulado de cortical osso suino com ABG crista íliaca anterior; | - | >3mm | -Grupo de controlo 70% ± 19,9  -Grupo de estudo 67% ± 14,9  - não existe diferenças significativas | - | O enxerto particulado de cortical osso suino pode ser utilizado com sucesso 1:1 misturado com ABG em sinus lift de seios maxilares severamente atroficos. |  |
| Esposito M, Grusovin MG, Felice P, Karatzopoulos G, et all. 2010 | Revisão sistematica |  | - | - | - | - | - | -Conclusões baseadas em poucos ensaios clínicos, com curtos follow-up (grande risco de vies);  -Varias técnicas podem ser utilizadas para aumentos osseos verticais ou horizontais, não é claro qual a mais eficaz.  -Os substitutos ósseos podem ser uma alternativa preferencial e serem usados para substituir ABG; | Realizada para a Cochrane |
| Pikdöken l, Gürbüzer B, Küçükodaci Z, Urban M, Bariş E, Tezulaş E. Scintigraphic 2011 | EC de boca dividida | -Visualizar a mistura de ABG com BBM na proporção de 1:4 Vs. BBM e o efeito na formação óssea ápos 4 meses do sinus lift.  -Amostra 24 p.  -4 meses: realizada uma cintilografia e biopsia para histologia e histomorfometria. | ABG Vs. ABG (20%) + BBM (80%) | Sim | 1-5mm | Cintolografia BBM + ABG (4,88± 0,98); ABG (4,55± 0,97), não é estatistícamente significativo;  Não existie grande diferenças histologicas.  Histomorfometria não é estatistícamente significativa:  - BBM + ABG: (25,73% ± 2,65%) novo osso formado; (34,24%± 8,81%) BBM presente; ( 39,89% ± 7,5%) tecido mole;  - BBM: (24,19% ± 2,19%) novo osso formado; (36,79%± 5,15%) BBM presente; ( 38,71% ± 4,97%) tecido mole; | - | Os resultados da sialografia, histologia e a histometria não exibem diferenças estatisticamente significativament no uso de BBM ou de BBM com ABG na proporção de 1:4, 4 meses ápos o sinus lift. |  |
| Crespi r, Mariani E, Benasciutti E, Capparé P, Cenci S, Gherlone E. 2009 | ECR boca dividida | Compara o MHA (grupo A) Vs. ABG (grupo B) no procedimento de sinus lift bilaterias atravez de ánalise histoformetrica e prerfil da expressão gentica in vivo .  -Amostra - 15 p,  -Ápos 5 meses foi realizada uma biopsia e colocados os implantes. | ABG extraido do ramo da mandibula Vs.MHA | - | <2mm | O volume osseo total não foi estatisticamente significativo (80,79%± 14,27% grupo A Vs. 78,40% ± 16.72% grupo B; P<0,05);  -Quantidade de osso vital menor para o grupo B (29,65% ± 9,81% Vs. 78.40% ± 16.72%; P<0,05) | - | O grande volume ósseo formado, apesar dos baixos valores de osso vital (associado possivelmente a uma baixa capacidade osteoclastogenica), podera ser explicado pela grande actividade óssea e recruta dos osteoblastos. |  |
| Silva FM, Albergaria-Barbosa J, Mazzonetto R. 2006 | EC de boca dividida | -Avaliar o uso de bBMP com BBP comparado com ABG em procediemento bilaterias de sinus lift,: modo clínico e radiologico.  -Amostra -10 p | ABG do ramo da mandíbula Vs.BBP + bBMP | - | - | Clinicamente a formação óssea foi melhor na área ABG | - | A formação óssea foi parcial e apresentou tecido fibroso na área do enxerto. Ao fim de 11 meses o processo de reparação óssea continuava incompleto.  Clínica e radiograficamente concluem que á utilização de ABG é melhor do que mistura de BBP com bBMP | Não nos são apresentados valores das medições radiograficas, ápenas uma avaliação do aspecto radiopaco. |
| Esposito M, Grusovin MG, Felice P, Karatzopoulos G et all. 2009 | Revisão sistematica | - | - | - | - | - | - | Conclusões baseadas em poucos ensaios clínicos, com curtos follow-up (grande risco de vies);  -Varias técnicas podem ser utilizadas para aumentos osseos verticais ou horizontais; não é claro qual a mais eficaz.  -Implantes curtos podem ser uma boa alternativa.  -Alguns substitutos ósseos são preferiveis ao ABG. | Realizada para a Cochrane |
| Thorwarth M, Srour S, Felszeghy E, Kessler P, Scultze-Mosgau S, et al. 2005 | EC | -Avaliar a reabsorção consuante a origem do enxerto.  -Total 57 p. submetidos a um sinus lift.  -ABG retromolar (n=14), Crista íliaca posterior (n=28) e anterior (n=15).  -Ápos 6 meses, colocação dos implantes e recolha de uma amostra análise. | -ABG: retromolar;  Crista íliaca anterior; -crista íliaca posterior | - | - | Mineralização do enxerto:  -retromolar: 68,7%±8,75%;  -Crista ílica anterior: 35,1%±7,6%;  -Crista íliaca posterior: 30,7%±9,5%;  - retromolar- significativo decrescimo( 53,0%±5,15%);  -Na Crista ílica anterior- estavel (36,1%±7,59%);  -Crista íliaca posterior- ligeiro aumento (34,5%±6,5%); | - | Dependendo da região de onde é colhido o ABG existe uma diferença na mineralização do enxerto osseo.  Ápos 6 meses ainda era possivel correlacionar com a origem do transplante. | Não refer a altura ossea inicial. |
| Wiltfang J, Schulteze-Mosgau S, Nkenke E, Thorwarth M, et all. 2005 | Estudo longitodinal retrospectivo | -Comparar enxertos osseos onlay e sinus lift com ABG em pacientes edentulos e a sobrevivência dos implantes a 5 anos.  -A mostra de 100 p. | Osso autolo recolhido da crista íliaca posterior e da crista íliaca anterior | - | - | -Grupo onlay: reabsorção de 20% no 1º ano; diminuio a velocidade de reabsorção ate ao 3º ano;  -Sinus lift: 17% no 1º ano; 2º ano de 7%; 3% no 3º ano;  -Não existe diferenças significativamente estatisticas entre os locais dadores; | - Taxa de sucesso dos implantes aos 5 anos: 93,1%;  - O grupo do sinus lift: taxa de sucesso 94,6%;  -O grupo aumento onlay: 91,5%; | -O grau de rabsorção diminui ao longo do estudo;  -Menores taxas de reabsorção e maiores taxas de sucesso dos implantes são apresentadas para o grupo -sinus lift; | Não refer a altura ossea inicial. |
| Schwartz Z, Goldstein M, Raviv E, Hirsch E, et al. 2007 | EC | -32 sinus lifts;  -8 procedimentos por grupo: (DFDA + Bio-Oss®, DBX®  + Bio-Oss®, DBX® , DBX® + β-TCP);  -8 meses ápos: colocação dos implantes, biopsia do enxerto para análise histologica e re-avaliação da altura óssea com TC. | -DFDA + Bio-Oss®;  - DBX®  + Bio-Oss®  -DBX® ;  -DBX® + β-TCP | - | 2.84±02mm | -Media dos 32 sinus lifts: 2,84 ± 0,2 mm antes do procedimento; ápos 15,2± 0,6mm.  -Biopsia a persentagem de novo osso e incorporação do enxerto:  DFDA + Bio-Oss®, DBX®  + Bio-Oss® e DBX® : + 10%  -O novo osso formado: -50% (DBX® + β-TCP) | - | -A formação óssea depende da forma do DFDA usada; -DBX® sozinho ou em combinação com outros materiais pode ser usado com sucesso nos sinus lift. | - |
| Torres J, Tamimi F, Martinez P, Alkraisat MH, Linares R. 2009 | ECR de boca dividida | -Ver se o PRP melhorava os resultados do ABB no sinus lift; objectivo secundario: efeitos da altura óssea residual, do tabaco e sobrevivência dos implantes.  -Amostra de 87 p  -Um lado Bio-Osse® e o grupo de teste Bio-Osse® com PRP.  -Resultados medidos clínicamente, radiograficamente, histologicamente e histomorficamente. | -Bio-Osse®  -Bio-Osse® com PRP | Sim | < 7mm  <4mm - 1 fase cirurgica  ≥4mm – 2 fases cirurgicas | - 6 meses: o Ct não apresentou diferenças entre os dois grupos, semelhante aspecto radiografico e densiometrico  -Aumento osseo semelhante em ambos os grupos: 10,4±0,7 PRP+ ABB e 9,4±0,7mm ABB.  -Histomorficamente: a área ocupada por novo osso é maior nas áreas tratadas com PRP, enquanto a média da área ocupada por particulas de ABB era semelhante nos 2 grupos. | A taxa de sucesso foi de 96,2% no ABB é de 98,6% no ABB+PRP, não foram encontradas diferenças entre os lados.  - Existe diferenças de sobrevivencia dos implantes colocados em 2 fases cirurgicas. | -Não foram encontradas diferenças entre os lados.  -O PRP pode melhorar as propriedades osteoconductivas aumentando o volume ósseo formado.  -Determinante para a sobrevivência dos implantes, colocados posterioremente são factores como: altura ossea inicial, paciente fumar ou o tipo de enxerto utilizado. | Indica que utiliza o PRP mas verdadeiramente a técnica utilizada e o PRGF. |
| Felice P, Antonio S, Pistilli R, Piattelli M, Pellegrino G, Esposito M. 2009 | ECR de boca dividida | -Comparar (Membrana rigida reabsorvivel Vs. Bio-Oss®)) no sinus lift..  -Amostra de 10 p.  Ápos 6 meses foram colocados 2 a 3 implantes e realizada uma biopsia.  Os resultados medidos: tempo necéssario para realizar o porcesso de aumento, osso ganho no TC, histomorfologia, complicaçôes, implantes, protéses perdidas, preferencias clínicas e do paciente. | -Membrana rigida reabsorvivel  - Bio-Oss® | Sim | 1-5mm | Não exestio uma diferença estatistícamente significativa em termos de tempo necéssario para a realização da cirurgia (19,8 membrana Vs. 20,5 Bio-Oss®)  Ambos os grupos após 6 meses apresentaram um aumento ossos estatistícamente muito significativo, mas sem difrenças estatiticas entre os dois grupos (14.4mm para a mebrana Vs. 14.1mm para o Bio-Oss®).  Histologicamnete mais osso foi formado do lado do Bio-Oss® 36,1% Vs. 24,2% no lado da membrana, sendo uma diferença significativamente estatistica (P=0,002).  Em termos de diferenças de complicações não foi significativamnete estatistico ( 2 perforaçoes da mebrana do lado da membrana Vs. 1 do lado do Bio-Oss®.  Preferencias por parte dos pacientes um mês ápos a cirurgia e um més ápos carga não existia diferneças significativas (8 paciente não preferirem nenhum lado, dois pacientes pereferiram o Bio-Oss®) | Não existio falha de nenhum dos implantes colocados (48 no total) | Não existir necéssidade de prencher o espaço formado pela colocação da mebrana com nenhum material de enxerto. É mais simples prencher este espaço com um substituto ósseo, do que a colocação da membrana. |  |
| Esposito M, Piattelli MP, Pistilli R, Pellegrino G, Felice P. 2010 | ECR de boca dividida | -Comparar duas tecnicas (Membrana rigida reabsorvivel Vs. Bio-Oss®)) para a realização do sinus lift.  -Amostra de 10 p. -Ápos 6 meses foram colocados 2 a 3 implantes.  Os resultados medidos 1 ano ápos carga do implantes: falha dos implantes e da protese, alguma complicação, mudanças do nivel osseo marginal periimplantar. | -Membrana rigida reabsorvivel  -Bio-Oss® | Sim | 1-5mm | 17.8±1,9mm – membrana rigida  216,9±2,8mm - Bio-Oss®  (6 meses após o aumento) | -Não existe uma diferença significativamente estatistica em termos de perda óssea nos dois grupos (média de 1,5 membrana Vs. 1,7mm Bio-Oss®).  -Não apresenta diferenças em termos falhas de implantes ou protéticas bem como complicações peri-implantares a nível ósseo marginal entre os dois grupos (4 complicaçoes no lado da membrana Vs. 2 no outro lado),. | Não necéssidade de prencher o espaço formado pela colocação da membrana com nenhum material de enxerto.  É mais simples prencher este espaço com um substítuto ósseo, do que a colocação da membrana. |  |
| Koch FP, Becker J, Terheyden H, Capsiun B, et al. 2010 | ECR multicêntrico | -rhGDF revestido com ß-TCP para suportar a formação óssea no sinus lift.  -.Amostra de 31 p divididos em 3 grupos: rhGDF/ß-TCP esperando 3 meses, rhGDF/ß-TCP e outro de controlo com mistura de osso autólogo com ß-TCP esperando em ambos quatro meses.  Avaliado: cicatrização e histomorfologica. | -rhGDF/ß-TCP -rhGDF/ß-TCP  -mistura de ABG com ß-TCP | - | - | Histologicamente uma remodelação óssea similar nos três grupos.  rhGDF/ß-TCP (3 meses) 31,4% (± 17%); rhGDF/ß-TCP (4 meses) 28% (± 15,5%); mistura de ABG com ß-TCP (4 meses) 31,8 (± 17,8%)  -Radiologicamente um aumento ósseo maior nos grupos em que foi usado o rhGDF.  rhGDF/ß-TCP (3 meses) 6,86mm (± s 4,34mm); rhGDF/ß-TCP (4 meses) 6,91mm (± s 4,75mm; mistura de ABG com ß-TCP (4 meses) 6,86mm (± s 4,95mm) | A taxa de fracasso dos implantes: rhGDF/ß-TCP 8,5 (4 dos 47; ABG com ß-TCP 0 perdas; | O rhGDF/ß-TCP mostrou-se tão efectivo e seguro como tratamento de controlo (mistura de ABG com ß-TCP). Futuramente devera ser realizada investigação em relação a eficácia e segurança em populações maiores. | As taxas de fracasso dos implantes encontrando-se de acordo com as taxas habituais que variam entre os 5 e os 15% |
| Boyapati L, Wang HL. 2006 | Artigo de revisão | - | - | - | - | - | - | A maioria dos estudos em humanos que alega os efeitos possitivos do PRP no sinus lift, apresentam –se falta de controlo ou com baixo poder.  São necessarios mais ensaios clinicos de modo a ser suportada esta tecnica. |  |
| Schaaf H, Streckbein P, Lendeckel S, Heidinger KS, Rehmann P, et al. 2008 | ECR | Entender a influencia do PRP no sinus lift.  -34 p.  -Avaliado por TC a densidade óssea, radiografia panoramica ao fim de 4 meses; comparação dos resultados histometricos. | -ABG crista iliaca  - ABG crista iliaca + PRP | - | 2-4mm | O PRP em combinação com ABG em comparação com ABG não apresentou um aumento da densidade ossea nas imagens de CT. | Colocados 245 implantes, 9 implantes falharam (3,67%) sem diferença significaticativamente estatistica entre os dois grupos:  5 implantes ABG crista íliaca + PRP;  4 implantes- ABG | O estudo demonstra não existir um efeito possitivo do PRP na densidade ossea apartir da avaliação do CT.  A densidade óssea do CT não apresenta correlação com a avaliação histomorfica. | Não nos são fornecidos os valores das medições radiologicas, da densidade osseoa bem como da histometria, para cada grupo.. |
| Bettega G, Brun J, Boutnnat J, Cracowski J, Quesada J, et al. 2009 | EC de boca dividida | Demonstra a osteogenecidade que ABG em pequenas quantidades misturado com PRGF providencia a quantidade suficiente para conduzir a colocação de implantes dentários.  -2º objectivo : comparar a osteogenicidade obtiada com ABG ilíaco, através de argumentos clínicos, radiológicos e histologicos  -18 p.  -6 meses após a cirurgia; realizado radiografia panorâmica e biopsia. | -.ABG da crista iliaca  -ABG da crista iliaca + PRGF | - | 1.75mm-6.25mm  Media de 3mm | Na radiografia panoramica o aumento medido não foi significativativamente estatistica a diferença entre grupos:  [ABG da crista iliaca 10mm (8,5;16.25);  ABG da crista iliaca + PRGF 11,5mm (9,5;16)].  Densidade de Hounsfield medida no TC não foi significativativamente estatistica a diferença entre grupos:  [ABG da crista iliaca 342 (269;405);  ABG da crista iliaca + PRGF 331 (271;419)  A análise histologica não apresntou diferenças entre os grupos [total de volume osseo – 50% (40%;54,8%) ABG da crista iliaca e 43,2% (40%;54,8%) ABG da crista iliaca + PRGF]  V olume osseo maturo ou imaturo– 42,5% (28,25%;51,15%) ABG da crista iliaca e 37,1% (31,15%;48,7%) ABG da crista iliaca + PRGF | Colocados 111 implantes permaneciam estáveis ápos 1 ano. | Conclui-se que pode ser reduzida em 60% o volume de osso autologo na elevação do seio maxilar: características histológicas ou mecânicas ao fim de 6 meses permanecem idênticas |  |
